# Supplementary material for: Membrane stiffness is modified by integral membrane proteins
Source: PubMed Central journal article supplement (PMC5314686; doi:10.1039/c6sm01186a), 2016-08-26
Supplement: SM-012-C6SM01186A-s012.pdf [file SM-012-C6SM01186A-s012.pdf]

## README.md

This file describes how these movies relate to the simulations discussed in the paper. The nomenclature is

```
movie-lipids-protein.mov
```

e.g.

```
movie-popc-kir2.2.mov
```

is a movie of Kir2.2 in the large POPC bilayer (sim #4 in Table S2 of the Supplementary Information). The ternary mixtures of DOPC, Sphingomyelin and Cholesterol are labelled pcschol and then followed by the ratio e.g. pcschol-226 is the high cholesterol mixture (60%). The below table relates each movie name to Table S2 of the Supplement.

| Sim # | Movie Name           | Legend                                                                                                                                                                                                                                  |
|-------|----------------------|-----------------------------------------------------------------------------------------------------------------------------------------------------------------------------------------------------------------------------------------|
| 3     | movie-popc.mov       | Movie of POPC lipid bilayer (54,684 lipids, blue). Duration = 5 $\mu$ s, interval between frames = 50ns, 12 frames per second. Waters not shown for clarity.                                                                            |
| 4     | movie-popc-kir22.mov | Movie of POPC lipid bilayer (55,584 lipids, blue) containing 144 copies of the inward-rectifying ion channel, Kir2.2 (red) . Duration = 10 $\mu$ s, interval between frames = 50ns, 12 frames per second. Waters not shown for clarity. |
| 5     | movie-popc-aqp0.mov  | Movie of POPC lipid bilayer (37,249 lipids, blue) containing 144 copies of the aquaporin, Aqp0 (salmon) . Duration = 5 $\mu$ s, interval between frames = 50ns, 12 frames per second. Waters not shown for clarity.                     |
|       |                      | Movie of 3:1 POPE/POPEG lipid bilayer                                                                                                                                                                                                   |

|    |                                      |                                                                                                                                                                                                                                                                            |
|----|--------------------------------------|----------------------------------------------------------------------------------------------------------------------------------------------------------------------------------------------------------------------------------------------------------------------------|
| 6  | movie-<br>popeg.mov                  | (41,472 lipids, medium blue and cyan, respectively). Duration = 5 $\mu$ s, interval between frames = 50ns, 12 frames per second. Waters not shown for clarity.                                                                                                             |
| 7  | movie-popeg-<br>btub.mov             | Movie of 3:1 POPE/POPEG lipid bilayer (28,888 lipids, medium blue and cyan, respectively) containing 144 copies of BtuB (pink). Duration = 10 $\mu$ s, interval between frames = 50ns, 12 frames per second. Waters not shown for clarity.                                 |
| 8  | movie-popeg-<br>ompf.mov             | Movie of 3:1 POPE/POPEG lipid bilayer (26,832 lipids, medium blue and cyan, respectively) containing 100 copies of OmpF (magenta). Duration = 10 $\mu$ s, interval between frames = 50ns, 12 frames per second. Waters not shown for clarity.                              |
| 9  | movie-popeg-<br>btubompf.mov         | Movie of 3:1 POPE/POPEG lipid bilayer (25,448 lipids, medium blue and cyan, respectively) containing 144 copies of BtuB (violet). Duration = 10 $\mu$ s, interval between frames = 50ns, 12 frames per second. Waters not shown for clarity.                               |
| 10 | movie-<br>pcsmchol-<br>811.mov       | Movie of 8:1:1 DOPC/sphingomyelin/cholesterol lipid bilayer (53,964 lipids, cyan, blue/green and yellow, respectively). Duration = 5 $\mu$ s, interval between frames = 50ns, 12 frames per second. Waters not shown for clarity.                                          |
| 11 | movie-<br>pcsmchol-<br>811-tnras.mov | Movie of 8:1:1 DOPC/sphingomyelin/cholesterol lipid bilayer (53,964 lipids, cyan, blue/green and yellow, respectively) containing 108 copies of tN-Ras (orange). Duration = 5 $\mu$ s, interval between frames = 50ns, 12 frames per second. Waters not shown for clarity. |
|    |                                      |                                                                                                                                                                                                                                                                            |

|    |                                      |                                                                                                                                                                                                                                                                                              |
|----|--------------------------------------|----------------------------------------------------------------------------------------------------------------------------------------------------------------------------------------------------------------------------------------------------------------------------------------------|
| 12 | movie-<br>pcsmchol-<br>226.mov       | Movie of 2:2:6<br>DOPC/sphingomyelin/cholesterol lipid bilayer<br>(53,964 lipids, cyan, blue/green and yellow,<br>respectively). Duration = 5 $\mu$ s, interval<br>between frames = 50ns, 12 frames per<br>second. Waters not shown for clarity.                                             |
| 13 | movie-<br>pcsmchol-<br>226-tnras.mov | Movie of 2:2:6<br>DOPC/sphingomyelin/cholesterol lipid bilayer<br>(53,964 lipids, cyan, blue/green and yellow,<br>respectively) containing 108 copies of tN-Ras<br>(orange). Duration = 5 $\mu$ s, interval between<br>frames = 50ns, 12 frames per second. Waters<br>not shown for clarity. |

All movies run at 12 frames per second with 50 ns between frames. They are not to scale.

*Philip W Fowler, May 2016*
